# Supplementary material for: Teleseismic P-waves at the AlpArray seismic network: Wave fronts,absolute traveltimes and traveltime residuals
Source: Copernicus journal article supplement (doi:10.5194/se-2020-189), 2020-12-10
Supplement: Supplementary file [file se-2020-189-AC2-supplement.pdf]

**Point-by-point response to Interactive comment on “Teleseismic P-waves at the AlpArray seismic network: Wave fronts, absolute traveltimes and traveltime residuals” by Marcel Heinz Paffrath et al.**

*Anonymous Referee #2*

*Received and published: 28 January 2021*

*General Comments:*

*In their study, Paffrath and co-authors present a strategy for an automated, combined estimation of absolute and relative P-wave arrival times of teleseismic waveforms for the AlpArray seismic network. The authors apply their method to 370 teleseismic earthquakes recorded by the AlpArray network, which includes 1025 permanent and temporary broad-band stations (including OBS stations in the Ligurian sea). The method is applied in two different frequency bands: 1. HF (Band-pass: 0.03-0.5 Hz (2 s – 33 s)), 2. LF (Low-pass: 0.1 Hz (10 s)). The HF dataset contains about 170'000 arrivals, the LF set contains 214'000 arrivals. The authors analyse and interpret the corresponding travel-times and corresponding residuals in terms of quality of the arrival times as well as potential velocity anomalies in the mantle. From the stacked residuals as well as stacks of azimuthal bins, the authors infer the presence and orientation of slabs beneath the Alpine orogen. In addition, the authors analyse and interpret travel-time differences between the two frequency bands and conclude that the observed difference is related to “finite-frequency effects”. Travel-times are planned to be used for a future tomographic inversion of the seismic velocity structure of the mantle.*

*The combined picking-procedure proposed by the authors is reasonable and the derived quality documented by the consistency of the derived travel-time fields and residuals seems very promising. The authors did a great job in attempting to quantify the errors of their arrival times (for the absolute picking as well as the cross-correlation differential time estimation) and their results (and their documented consistency) is quite impressive, hopefully leading to new high-quality images of the mantle structure beneath the Alps. Nevertheless, I have several comments listed below, which hopefully help to improve the quality of this study and presumably require at least moderate revision of the manuscript.*

[Thank you very much for your comments, suggestions and the very detailed discussion of our work.](#)

*Specific comments:*

*1) My main concern relates to the interpretation of the presented travel-time residuals. The authors argue that the residuals are mainly related to mantle structure and in the discussion and interpretation residuals are mainly associated with the presence of lithospheric slabs and possible impact of crustal structures are largely ignored/faded out. According to the authors, the argument for this is that residuals calculated for the crustal model of Diehl et al. 2009 (shown in their Figure A2) look different and are of smaller amplitude. The comparison of absolute amplitudes, however, is difficult, since no colour-scale for the residuals is included in Figure A2. In addition, it is not clear to what reference 1D model the residuals shown in Figure A2 relate. Also, what is meant with “near-surface model” (caption in Figure A2)? Is it just the shallowest part of the crustal model of Diehl et al. 2009 or the entire crustal model? Most importantly, the distribution of teleseismic residuals related to crustal structure (compared to a 1D crust) shown in Figure A2 deviates from other estimates e.g. the one of Waldhauser et al. 2002 (Figure 6 in that paper). Waldhauser et al’s model predicts negative residuals <-0.5 s along the western Alpine Arc related to the Ivrea Body and strong positive residuals (>1.0 s) related to the Po-plane sediments. Both signals seem to be completely missing in Figure A2 (although at least the Ivrea anomaly is completely included in the crustal model of Diehl et al. 2009). Also, the Molasse sediments in the northern foreland are not visible in A2. It seems to me that the residuals shown in A2 mainly correlate with the crustal thickness (negative where relatively thinner*

*crust, positive where relatively thicker (e.g. crustal root of the Alps/Apennines) but other effects (e.g. sedimentary basins, Ivrea body) are missing. Especially the Ivrea body could have quite a huge impact and I would assume that parts of the negative residuals in the western Alpine Arc (the region labelled "W" e.g. in Fig. 6) are affected by the Ivrea body rather than evidence for a slab. Ivrea is not mentioned in the entire manuscript although it is expected to be one of the strongest shallow anomalies in the Alps. Some parts in the discussion of the observed residuals also seem inconsistent. E.g. on page 19 line 400 the authors say the "W" anomaly should be shallow (which would be consistent with the Ivrea body), then on page 25 (line 531) they associate it with the subducted European lithosphere (which I would not describe as a shallow anomaly).*

We did not plan to interpret the traveltimes residuals in detail in the first place and mainly wanted to show the data and residual patterns as a documentation of our work prior to a traveltimes tomography, without making assumptions on e.g. crustal structures, knowing that the model by Diehl is not complete, especially in areas with low station and/or event coverage (e.g. in the Po-plain) and does not extend over the whole study area of AlpArray. Therefore, we mainly wanted to show that the residual pattern we get by calculating residuals through the regional tomography model by T. Diehl has a very different shape and the residuals are mainly influenced by mantle structures. Upon request of the editor, we extended the interpretation of our results and tried to correlate them with possible anomalies, mainly in the upper mantle.

However, we are now aware that the effect of the crustal anomalies should be discussed in more detail when trying to interpret residuals as mantle-dominated as the crust of course has a great impact on the overall residuals and the calculation of crustal residuals of the Diehl model is not sufficient. Due to our simultaneous work on the tomography, we meanwhile created a more complete crustal model using additional information from the EuCRUST-07 model (Tesauro et al. 2008) and Moho information of Spada et al. (2013). The new model also includes sedimentary basins such as the Po-plain and the Molasse basin. Hence, we decided to correct the stacked residuals we show using information of this new model (assuming a horizontal planar wavefront, only crustal part of Diehl) and also present a residual map of this model relative to the minimum 1D model of Diehl et al., comparable to Fig. 6 of Waldhauser et al. (2002). As a consequence, we also modified our interpretations of the resulting maps of traveltimes residuals.

*Also, I do not fully understand the meaning of the ("demeaned") residuals shown in the different figures and if (and how) they are comparable in absolute terms. The authors write on page 15 (around line 335) that "the stacked residuals are relative to an unknown 1D earth model [ . . . ] and not to a standard earth model". Does the comparison of absolute residuals with the ones of figure A2 then make sense? How different is the "unknown 1D model" from the 1D model assumed for figure A2? If comparable, it would then make more sense to subtract the predicted crustal part (A2) from residuals shown in other figures (e.g. Figure 6 etc). Then the corrected residuals would reflect pure mantle signals (assuming the crustal corrections are correct and complete). Why are the colour bars in most Figures (e.g. 6, 7) labelled as "average time difference" and not "Travel-time residuals" (as used in the text)?*

In principle, the true 1D model is different for each event. However, since for teleseismic waves incidence angles are rather steep waves from all events see most of the mantle and crust beneath the Alps before reaching the stations. Thus, we may hope that the true 1D models only differ marginally from each other. If this is true then the residuals represent structural perturbations from this 1D model which average to zero. We think it makes sense to subtract residuals for a crustal model if the 1D model assumed for the crust is the average of the crustal 3D model and the residuals average to zero over the array.

We changed the colour bar labels to "traveltimes residuals".

*The authors spent a lot of thoughts and work into the error estimation of their automatic picks. But they do not seem to use this information for the residual analysis and their interpretation. In my*

*opinion it would be more consistent to have section 5 (the description of error distribution) in front of section 4 (the section with the results) and use the observational weights for the stacking of the residuals to get quality-weighted stacks. In the current version, as far as I understand, no weighting is used for the stacked residuals, right?*

We interchanged section 4 and 5 and also followed your suggestion of weighting the residuals in the stacking process by the pick uncertainty.

*In summary, the discussion of the observed travel-time residuals should be improved and extended and crustal anomalies possibly affecting the observed residuals (including conclusions of others like Waldhauser et al 2002 or Zhao et al. 2016) should be properly discussed. Also, the authors should address specifically the open questions of Alpine mantle structure and what their preliminary results could potentially contribute to solve them. E.g. Western Alps: Continuous vs detached slab (Lippitsch, Zhao), Eastern Alps: slab reversal (Lippitsch, Mitterbauer). E.g. what is the interpretation of the positive residuals in SE-France? Does this correlate with any feature of previously published models?*

*On the other hand, since the authors obviously also work on a tomographic inversion of this data set, the whole “preliminary” interpretation of the “raw” residuals could also be drastically shortened and residuals and travel-time fields can be discussed primarily with the goal to document the consistency of their derived travel-time data.*

We slightly modified the structural interpretation of the traveltime residuals trying to find a compromise between your suggestions and those of the topical editor. We want to keep the interpretation because we find it interesting and also surprising how many conclusions can be drawn from the “raw” residuals only (in particular from the shifting of the patterns with varying azimuth). They provide a useful guideline when judging the plausibility of a tomographic model derived from them.

*2) The description of the picking procedure is a bit difficult to follow in some places. Maybe the description could be supported by a flow-diagram summarizing the key steps of the proposed method and/or a sketch figure with a generic seismogram illustrating some of the key parameters such as  $tmpp$ ,  $tepp$ ,  $tlpp$ , etc. Also, I miss some key references in section 3, which indicate that the proposed method is not entirely new but has used/proposed already by others (in slightly different forms). Only in the discussion the authors mention two papers (Rawlinson & Kennett, Mitterbauer) using a similar approach. But there are other groups using the same idea of CC, stacking, absolute pick on stack and then correcting absolute picks with the CC-information. One of them was proposed by Rowe and co-workers (e.g. Rowe et al 2002, BSSA (An Automatic, Adaptive Algorithm for Refining Phase Picks in Large Seismic Data Sets)). Also “classic” references to AIC-pickers, Higher-Order statistics and beamforming should be added when introduced the first time in the manuscript. In the discussion, the authors should also compare the performance of their processing in a more quantitative matter with other studies. E.g. how absolute and relative uncertainties compare with other teleseismic data sets in the Alps (Lippitsch, Mitterbauer, Zhao) or elsewhere. Additionally, useful information to be discussed: How computationally expensive is their method? How long does it take to process this dataset? Is the code to parallelized? What are the computational requirements? Is the code published and usable for others?*

We have added a flow diagram of the picking algorithm in the revised manuscript, showing the different steps of the algorithm and also included further references.

We also included a qualitative comparison of the uncertainties of our data with those of other data sets used in previous tomographic work on Alpine mantle structure. However, not all of these publications give detailed information on their pick uncertainties, neither in a quantitative nor in a qualitative way (i.e. how they are estimated).

The code is parallelized, but not completely optimized yet. It was running on a ~5 year old 20 CPU machine, where the computation time of one correlation onset including error estimation for a single station averages at about 0.5s. For the full db<sub>0.5</sub> dataset computation was finished in less than a day.

3) I understand that the difference in travel-time residuals between HF and LF data is interpreted as “finite-frequency” effect (e.g. page 26, l. 565) by the authors. In the abstract, however, the authors write, “caused by velocity dispersion”. Somewhere else (section 4.4) the authors explain “velocity dispersion due to attenuation” and then mention “finite frequency effect (finite wavelength effect)” as alternative explanation, which seems to relate to the different physical resolution due difference in frequency content. Later in that section the authors mention the effect of “wavelength smoothing”. None of these mentioned “effects” comes with a reference and I find it confusing what “effect” the authors finally prefer to explain the observed difference in travel times. I interpret “finite-frequency effect” as the “wavefront-healing effect” e.g. described by Wielandt 1987 or Hung et al 2001. Is this what the authors mean? I would suggest to use a consistent and homogeneous terminology in all parts of the manuscript and to improve the description of potential effects (including references describing these effects).

We reworked the part dealing with the observed frequency dependence. As “finite-frequency effect” we refer to wave propagation phenomena that deviate from the predictions of ray theory which is a zero-wavelength approximation. One example is the wavefront healing effect described by Wielandt but also diffractions or interference phenomena are an expression of the finite wavelength of real seismic waves. Dispersion by attenuation refers to the fact that wave velocities become frequency dependent in attenuating media. It is different from geometric dispersion created when waves propagate in finite bodies (e. g. surface wave dispersion). In the revised manuscript, we now use the terms “finite-frequency effect” and “dispersion by attenuation” only. Moreover, we have slightly reduced the discussion about dispersion by attenuation because the observed average bias between high and low-frequency travel times can most easily be explained by the group delay of the applied filter. On the other hand, we show that the (demeaned) residuals are not affected by the filter.

4) The English should be further improved in my opinion. I spotted several issues in grammar, punctuation, and style, some examples are listed below. In general, I found superfluous repetitions as well as vague and rather qualitative statements (e.g. “highly important”, “highly accurate”, “drastically higher signal-to-noise ratio”) in many places of the manuscript, which should be improved in another round of proofreading. Try to replace these qualitative statements with quantitative ones if possible (e.g. “results in improvement of signal-to-noise by a factor of X”)

We went through the text again in detail and tried to improve the mentioned statements. There should be a proofreading by the publisher in the typesetting process.

Detail comments:

- l. 5: At this point it is not clear what the frequencies relate to (high-pass or low-pass, lower or upper corner?). - l. 10: “reproducible” -> “stable”?

Done

- l. 17: “. . . way lower” -> “X times smaller” or “a factor of X smaller”

Estimated the SNR factor

- l. 19: “location dependant” what does that mean? Site-specific noise at station or depending on the source (earthquake) location (e.g. shallow versus deep)?

Site-specific noise!

- I. 25: "At its core" -> "The backbone"?

Done

- I. 27: -> "river Main in Germany"

Done

- I. 35: -> add references for tele-tomo methods

Done

- I. 36: -> explain why resolution is limited to 500 km depth (network aperture controls cross-firing at depth) or give reference

Done

- I. 40: I would mainly argue that FWI needs a good (3-D) starting model and therefore requires knowledge from travel-time tomo

Absolutely! It got lost somewhere in the manuscript preparation process.

- I. 50: "oscillatory" is there a better word? E.g. "monochromatic"? "emergent"?

monochromatic

- I. 64: "earthquake location" -> I would say that these picking methods work well on local to regional scales and have been used for earthquake location and local earthquake tomography methods.

Done

- I. 65: it sounds like tele-tomo requires higher precision than local and regional methods... I would rather argue that CC can be used for tele-tomo because of the homogeneous simple waveforms from a close to planar wave-front incident from below. Therefore, CC is not usable for local, regional methods, unless you have similar earthquakes (e.g. used in relative relocation).

That was not our intention and we changed this part.

- I. 75: "Using AlpArray data, we demonstrate that. . ."

Done

- I. 81: ". . . prior to any tomographic inversion ... in the upper mantle."

Done

- I. 85: ". . . network Z3 started in 2015." Also: somewhere here I would expect the reference to a Figure showing this network, could be combine with existing Figure 1 (a=network map, b=event distribution)

Done, added figure reference

- I. 92: "Moho jump" -> "Moho offset" Also: Add references for all these possible structures in Moho and slab geometry.

Done

- I. 96: -> "peak in station. . ."

Done

- I. 102: You used the gCMT catalogue, did you use the centroid-time as origin time? This time might be different to the origin-time derived from P-waves (e.g. used by NEIC or ISC), right? Could that explain some of the larger differences between predicted and observed P-onsets you report later? Why not use a body-wave based OT as reported by NEIC or ISC catalogues?

Yes we used centroid times as onset times in our database, as we also want to use them for a later FWI. Differences to the theoretical onsets we calculate can also be influenced by the difference between the origin times. We made this clear in the text now.

- I. 105: What order did you use for your filters? Did you make sure that phase-shifts are avoided? Zero-phase filter? Can you exclude any impact of filters to the difference in the two data sets?

We use 4<sup>th</sup> order butterworth bandpass filtering. Hence, there will be time shifts that are frequency dependent. They can indeed explain easily the observed average bias between the traveltimes picked at different frequencies. But we show in the revised version that the (demeaned) traveltimes residuals are not affected by the filter because the group delay cancels when subtracting the array average.

- I. 118: what do you mean with these “statistical anomalies”? Anomalies in terms of what?

We meant features that are conspicuous. However, we removed this from the manuscript.

- I. 140: “low-noise beam trace” add a reference in which beamforming is described

Done

- I. 160: “higher-order . . . and the Akaike” add references where this has been described and used for picking.

Done

- I. 165: somewhere it has to be clearly mentioned that this HOS/AIC picker is used for the individual traces (to get a time reference for the CC) as well as for the absolute pick derived from the stacked seismogram. At least this is how I understand it. . . What is the advantage of applying AIC to the HOS-CF rather than directly on the seismogram? Shouldn't the AIC work as well on the original seismogram? Using the HOS-CF might introduce systematic shifts due to the finite window length used for the moving-window approach in the HOS-CF calculation. Can you exclude delays caused by window length? Is the window-length fixed or dynamic (considering the frequency content of the signal)?

We would kindly refer you to the paper by Kueperkoch et al. (2010) for those detailed questions, as we are using their algorithm for the AIC onsets.

- I. 198: You mentioned “manually evaluated”. Did you compare picks and uncertainties to a subset of manually determined onsets at some point to assess the quality and reliability of this approach?

No, we manually validated the picks (by visual inspection) to find out about systematic problems.

- I. 199: “The reason for this is . . .”

Done

- I. 205 and elsewhere: “anchor point” -> “time reference” or “reference time”

Done

- I. 210: Again, is it possible that the large time offset between predicted and actual onset is due to the fact that you use the gCMT centroid OT? Would that be the same if you use NEIC or ISC times?



Yes, included this.

- I. 222: "foots on" -> "is based on the assumption"

Done

- I. 234: "as representer" -> "to be representative of"

Done

- I 244: not clear, did you pick the onset on the beam by hand or automatically (or both?) in your study? If automatic, it's the algorithm described in 3.2, correct?

We used the automatic picking algorithm, added this.

- Figure caption 3: When reading the caption, it is not yet clear that there are uncertainties for the absolute as well as relative onsets calculated (the description of the relative only comes later). Maybe say "Onset uncertainties for absolute and relative onsets (as described in the text) are displayed by . . ."

Made this clearer in the figure caption.

- I 247: It's the first time the traces are correlated with the beam, not the second time, right? "The travelttime of. . ." -> "the travelttime at. . ."

Each station is correlated for the first time with the reference station. After beamforming another correlation is done with the beam trace.

- I. 252: delete "by construction"

Done

- I. 253 and elsewhere: "jitter" -> "scatter"

Done

- I. 271: "any signs" -> "any evidence"

Done

- I 285: Does your error assessment for CC-delays also identifies possible problems with cycle-skipping? This is particular problematic for emergent onsets. A potential sign for this is neighbouring local peaks in the CC-CF. Is your algorithms able to identify this?

The algorithm searches for severe outliers. However, we also visually inspected the travelttime patterns of each event for remaining outliers (there were only a hand full). Also added this in the text.

- I. 286: not sure "significant coda" is the right term here. It is more additional complexity in the signal, e.g. caused by converted phases. It's not really a long lasting "coda". . .

Done

- Figure 3: Should be bigger (portrait arrangement), in caption say that this is one event (and which one). "heavy outlier" -> "severe"? how is this outlier defined? Here and elsewhere in text and other captions: "temporal distance of 1 s": This sound quite wrong to me. You should rephrase this, e.g. "isochrone contour intervals of 1 s" or something. . .

Made this clearer in the text. Also increased figure size and put them below each other.

- I. 293: "superiority" -> please rephrase that e.g. "demonstrates the improvement"

Done

- I. 297: shouldn't it be NE to SW?

Yes indeed!

- Figure 5: Put azimuth and distance as bold text in the figure itself, this makes it easier to compare (otherwise one needs to find this in the caption).

Done

- I. 310: isn't it a obvious fact that the larger the epicentral distance the steeper the incidence, the higher the apparent velocity?

Yes this is true. However, we wanted to highlight this fact for a broader audience with non-seismological background as well.

- I. 314 and elsewhere: "widening" -> "broadening"?

Done

- I. 335: "find out" -> "identify"

Done

- I. 335: "It is highly important. . ." Please rephrase that sentence, it's also not clear to me what you mean here (see my general comment on comparison of residuals).

See above

- I. 334: "mantle events" -> you mean "mantle phases", right? Not earthquakes in the mantle...

Yes we do!

- I. 346: "completely overwhelm" -> rephrase, maybe "dominate over data from poorly. . ." - Figure 6: Make the inset bigger (currently it has the same size as the original data, not clear what's the benefit of it). What is "structures Vp values. . ."? Where is the tectonic map of M. Handy you mention in the caption?

Rephrased the sentence and increased size of inset. We decreased the point size of the residuals in the inset so that each station of the dense SWATH-D network can be seen individually, as they overlap in the main figure. The tectonic map is in the background of the residuals, but will now be shown separately together with the different networks.

- I. 378: "Features that start to move" please rephrase. . . the are "laterally shifted" or something.

Done

- I. 382: "reinforced" -> "enhanced"?

Done

- I. 385 "OBS" -> "OBS stations"

Done

- I. 395: "survive" -> rephrase, maybe "remain"?

Done

- Figure 9: Too small, add color bar. . .



Increased Figure size. However, we decided not to add a color bar here which would be redundant as the precise uncertainties are shown in the x-axis of the plot. We changed the caption to clarify that we coloured the histogram for an easier comparison to the following map plot.

- I. 484: *“positive impact . . . is salient”* Not sure, I don't see this in Figure 10, symbols are too small, make Figure 10 bigger. . .

Done

- I. 496: *“have tightened”* -> please rephrase

Done

- I. 497: *“A way out of this dilemma”* -> please rephrase. . . *“To overcome this problem. . .”*

Done

- I. 532: *“We do not carry out here. . .”* -> please rephrase

Done

- Discussion: *Please carefully revise the English in this part. . .*

Done
